# Supplementary material for: Synthesis and characterization of large-area and continuous MoS2atomic layers by RF magnetron sputtering
Source: Royal Society of Chemistry journal article supplement (doi:10.1039/c5nr09032f), 2016-01-01
Supplement: c5nr09032f1.pdf [file c5nr09032f1.pdf]

Electronic Supporting Information

***Synthesis and characterization of large-area and continuous MoS<sub>2</sub>  
atomic layers by RF Magnetron Sputtering***

*Sajjad Hussain<sup>1,2</sup>, Muhmmad Arslan shehzad<sup>1,2</sup>, Dhanasekaran Vikraman<sup>1,2</sup>, Muhammad Farooq Khan<sup>3</sup>, Jai Singh<sup>1,2</sup>, Dong-Chul Choi<sup>1,2</sup>, Yongho Seo<sup>1,2</sup>, Jonghwa Eom<sup>3</sup>, Wan-Gyu Lee<sup>\*4</sup>, and Jongwan Jung<sup>\*1,2</sup>*

*<sup>1</sup>Graphene Research Institute, Sejong University, Seoul 143-747, Republic of Korea*

*<sup>2</sup>Institute of Nano and Advanced Materials Engineering, Sejong University, Seoul 143-747, Republic of Korea*

*<sup>3</sup>Department of physics and Graphene Research Institute, Sejong University, Seoul 143-747, Republic of Korea*

*<sup>4</sup>National Nano Fab Center, Daejeon, Republic of Korea.*

Table.S1-a. Deposition conditions maintained during the preparation of RF magnetron sputtered MoO<sub>3</sub> films.

|                                     |                                        |
|-------------------------------------|----------------------------------------|
| <b>Sputter target</b>               | <b>Molybdenum (99 % pure) 3 ×1/8 t</b> |
| <b>Target to substrate distance</b> | 50 mm                                  |
| <b>Base pressure</b>                | 2x10 <sup>-6</sup> torr                |
| <b>Working pressure</b>             | 3x10 <sup>-3</sup>                     |
| <b>Gas flow Ar /Oxygen</b>          | 10/20 sccm                             |
| <b>Sputter power</b>                | 150 W                                  |
| <b>Sputter time</b>                 | 1L-50 Sec, 2L-80Sec, 3L 100 Sec.       |

After deposited films (50, 80, 100 and 150 sec) were placed in an annealing chamber and heated up to 650°C for 1 hour. The carrier gas flow rate was maintained at 100 sccm, and the pressure of chamber was kept at 2 x10<sup>-2</sup> Torr.

Table S1-b. The pressure of chamber during the growth.

|                          |                         |
|--------------------------|-------------------------|
| Annealing base pressure  | 2×10 <sup>-2</sup> Torr |
| Ar gas pressure/100 sccm | 3×10 <sup>-1</sup> Torr |

Table S2. Preparation conditions and the number of layer of MoS<sub>2</sub> films

| <b>Sputtering time<br/>(sec)</b> | <b>Sulfur powder content<br/>(g)</b> | <b>Number of layer</b> |
|----------------------------------|--------------------------------------|------------------------|
| 40                               | 0.25                                 | No film growth         |
| 50                               | 0.25                                 | Monolayer              |
| 80                               | 0.25                                 | bilayer                |
| 100                              | 0.25                                 | Trilayer               |
| 150                              | 0.25                                 | Few layers             |

**Table S3** Literature values comparison of observed electrical parameters for MoS<sub>2</sub> (mono to few-layer) grown by different methods.

| Sr. No. | Growth method                                                   | V <sub>ds</sub>   | I <sub>on</sub> /I <sub>off</sub>                                | Mobility cm <sup>2</sup> /Vs      | Ref. |
|---------|-----------------------------------------------------------------|-------------------|------------------------------------------------------------------|-----------------------------------|------|
|         | Sputtering (MoO <sub>3</sub> ) + CVD                            | 1 V               | ~ 10 <sup>7</sup> (2L)<br>10 <sup>4</sup> ~ 10 <sup>5</sup> (3L) | ~21 (2L)<br>~25 (3L)              |      |
| 1       | Sputtering (Mo) + CVD                                           | 0.5 V             | 10 <sup>6</sup>                                                  | 12.24                             | [26] |
| 2       | CVD (MoCl <sub>5</sub> + S)                                     | 2V                | 10 <sup>4</sup> ~10 <sup>5</sup>                                 | 0.003–0.03                        | [14] |
| 3       | CVD (MoO <sub>3</sub> + S) on rGO                               | 2 V               | ~ 10 <sup>4</sup>                                                | 0.02                              | [33] |
| 4       | MoS <sub>2</sub> powder +<br>Mo/Sapphire                        | 1 V               |                                                                  | 192                               | [11] |
| 5       | E-beam (Mo) + CVD                                               | 1mV to 1V         |                                                                  | 0.004~0.04                        | [53] |
| 6       | CVD(MoO <sub>3</sub> + S)                                       | 100 mV –500<br>mV | ~ 10 <sup>8</sup>                                                | 17                                | [54] |
| 7       | CVD(MoO <sub>3</sub> + S)                                       | 1mV - 1V          | 10 <sup>4</sup> ~10 <sup>6</sup>                                 | 0.1~ 0.7                          | [19] |
| 8       | Thermolysis of (NH <sub>4</sub> ) <sub>2</sub> MoS <sub>4</sub> |                   | ~ 10 <sup>5</sup>                                                | 4.7 ~ 6                           | [10] |
| 9       | CVD(MoO <sub>3</sub> + S)                                       | 1 V               | ~ 10 <sup>3</sup>                                                | 0.09                              | [31] |
| 10      | Exfoliated (electrochemical)                                    | 1 V               | ~ 10 <sup>6</sup>                                                | 1.2                               | [49] |
| 11      | CVD(MoO <sub>3</sub> + S)                                       | 200 mV ~ 1 V      | ~ 10 <sup>6</sup>                                                | 2 ~ 7                             | [12] |
| 12      | E-beam (Mo) + CVD                                               | 1 V               | ~ 10 <sup>3</sup>                                                | 6.5                               | [13] |
| 13      | CVD(MoO <sub>3</sub> + S)                                       |                   | > 10 <sup>6</sup><br>(low temp.)                                 | 45(isolated<br>single<br>crystal) | [6]  |

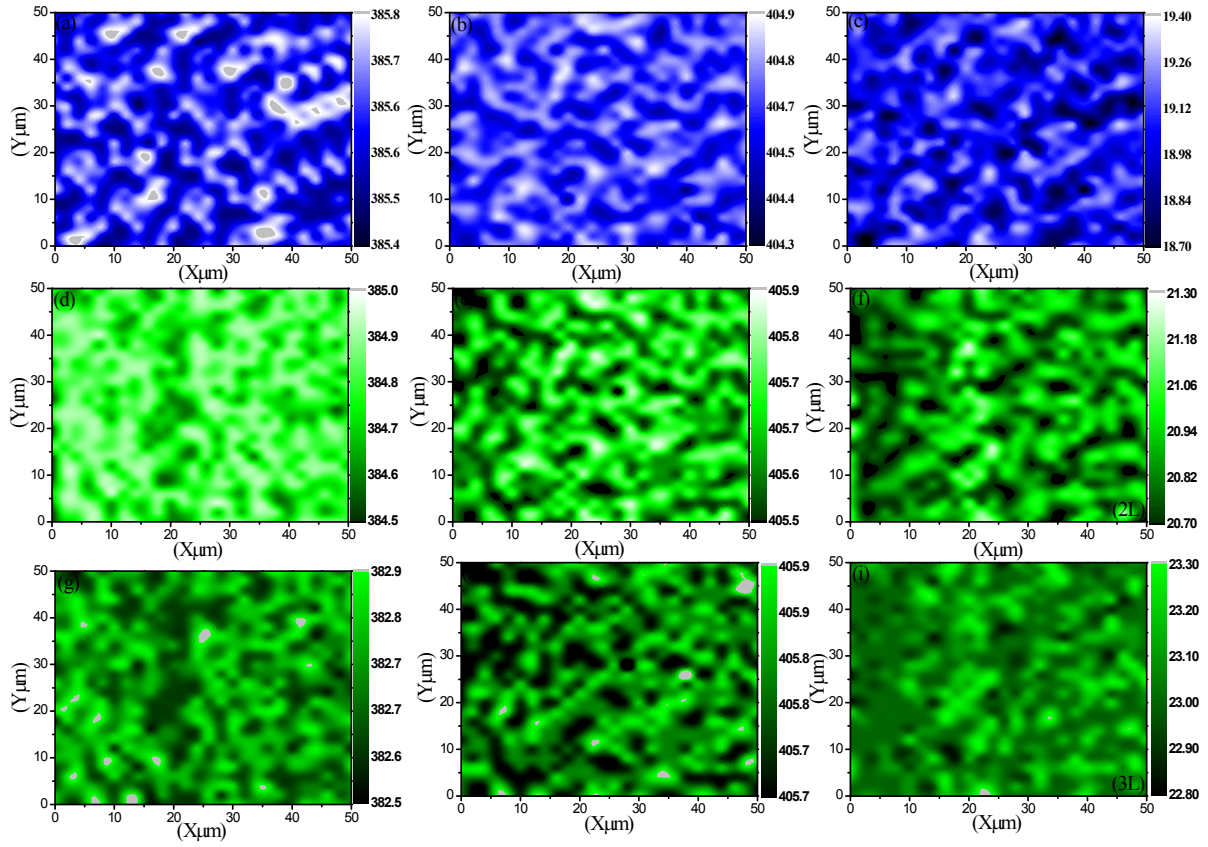

**Figure S1.** Statistical analysis of Raman mapping **(a-c)**  $E_{12g}^1$ ,  $A_{1g}$  peak energy and  $\Delta$ value of monolayer film **(d-f)**  $E_{12g}^1$ ,  $A_{1g}$  peak energy and  $\Delta$ value of bilayer film **(g-i)**  $E_{12g}^1$ ,  $A_{1g}$  peak energy and  $\Delta$ value of trilayer film.

**Table S4** Statistical analysis of Raman mapping of mono, bi and trilayer MoS<sub>2</sub> film.

|                            |                    | <b>Monolayer MoS<sub>2</sub></b> | <b>Bilayer MoS<sub>2</sub></b> | <b>Trilayer MoS<sub>2</sub></b> |
|----------------------------|--------------------|----------------------------------|--------------------------------|---------------------------------|
| <b>E<sub>2g</sub> mode</b> | Average            | 385.6                            | 384.7                          | 382.7                           |
|                            | Max                | 385.8                            | 385                            | 382.9                           |
|                            | Min                | 385.4                            | 384.5                          | 382.5                           |
|                            | Standard deviation | 0.11                             | 0.11                           | 0.11                            |
| <b>A<sub>1g</sub> mode</b> | Average            | 404.6                            | 405.6                          | 405.8                           |
|                            | Max                | 404.9                            | 405.9                          | 405.9                           |
|                            | Min                | 404.3                            | 405.5                          | 405.7                           |
|                            | Standard deviation | 0.12                             | 0.11                           | 0.07                            |
| <b>Δ k</b>                 | Average            | 19.0                             | 20.8                           | 23.0                            |
|                            | Max                | 19.4                             | 21.3                           | 23.3                            |
|                            | Min                | 18.7                             | 20.7                           | 22.8                            |
|                            | Standard deviation | 0.17                             | 0.12                           | 0.10                            |

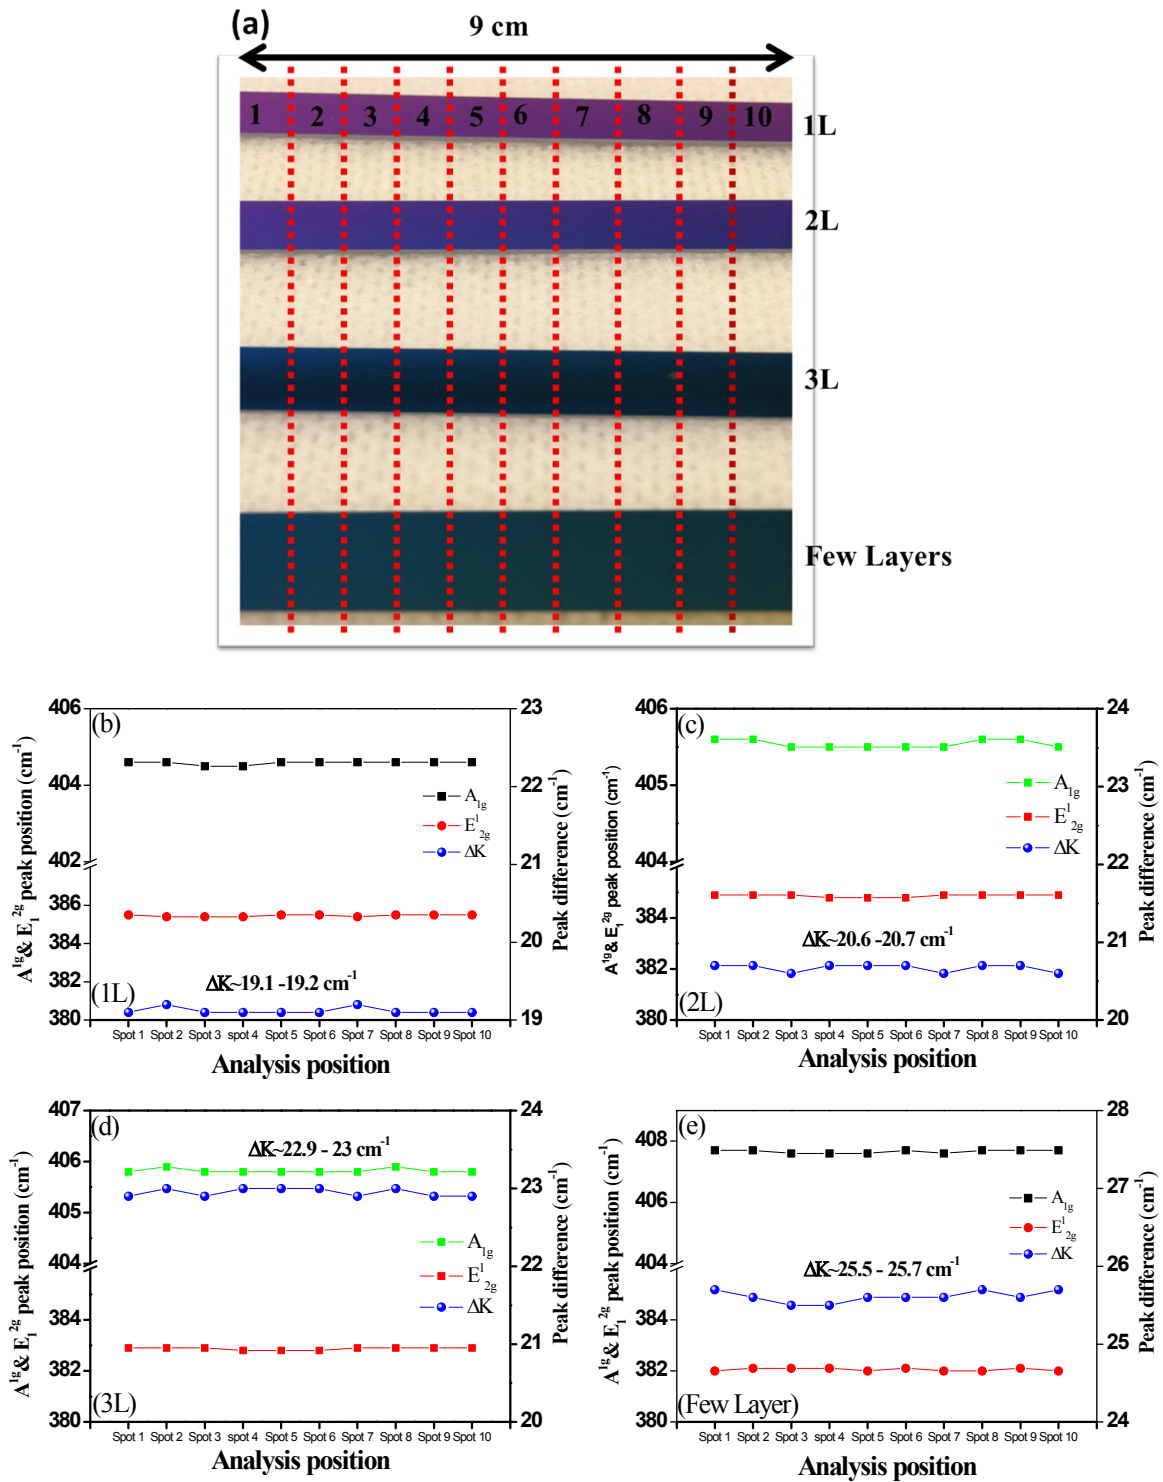

**Figure 2** (a) Large-area (approximately 9 cm) mono-, bi-, tri-, and few-layer MoS<sub>2</sub> films on SiO<sub>2</sub> substrates), (c-d) relative Raman peak position of  $E_{12g}^1$  and  $A_{1g}$  bands and the peak differences ( $\Delta K$ ) plotted as a function of numbered spot at ten measurement points on the mono-, bi-, tri-, and few MoS<sub>2</sub> films. For monolayer average peak difference ( $\Delta K$ ) values are in the range of  $\sim 19.1 - 19.2 \text{ cm}^{-1}$  (with a standard deviation  $\sim 0.042 \text{ cm}^{-1}$ ). For bi tri and few

layer ( $\Delta k$ ) values are in the range of  $\sim 20.6 - 20.7 \text{ cm}^{-1}$  (with a standard deviation  $\sim 0.048 \text{ cm}^{-1}$ ),  $\sim 22.9 - 23 \text{ cm}^{-1}$  (with a standard deviation  $\sim 0.052 \text{ cm}^{-1}$ ) and  $\sim 25.5 - 25.7 \text{ cm}^{-1}$  (with a standard deviation  $\sim 0.073 \text{ cm}^{-1}$ ) respectively.



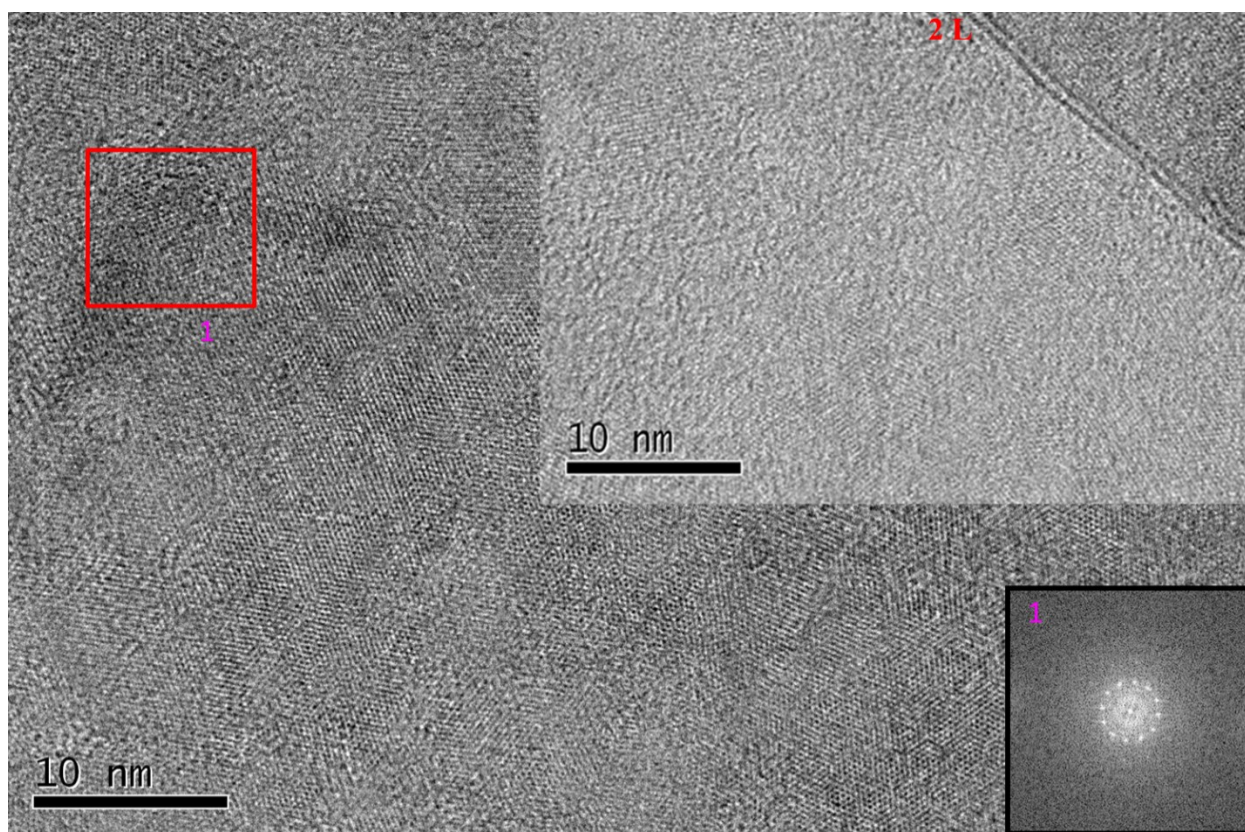

**Figure S3** HRTEM image of MoS<sub>2</sub> film synthesized from MoO<sub>3</sub> sputtered at 80 sec. The observed bilayer structure and FFT pattern is inserted.

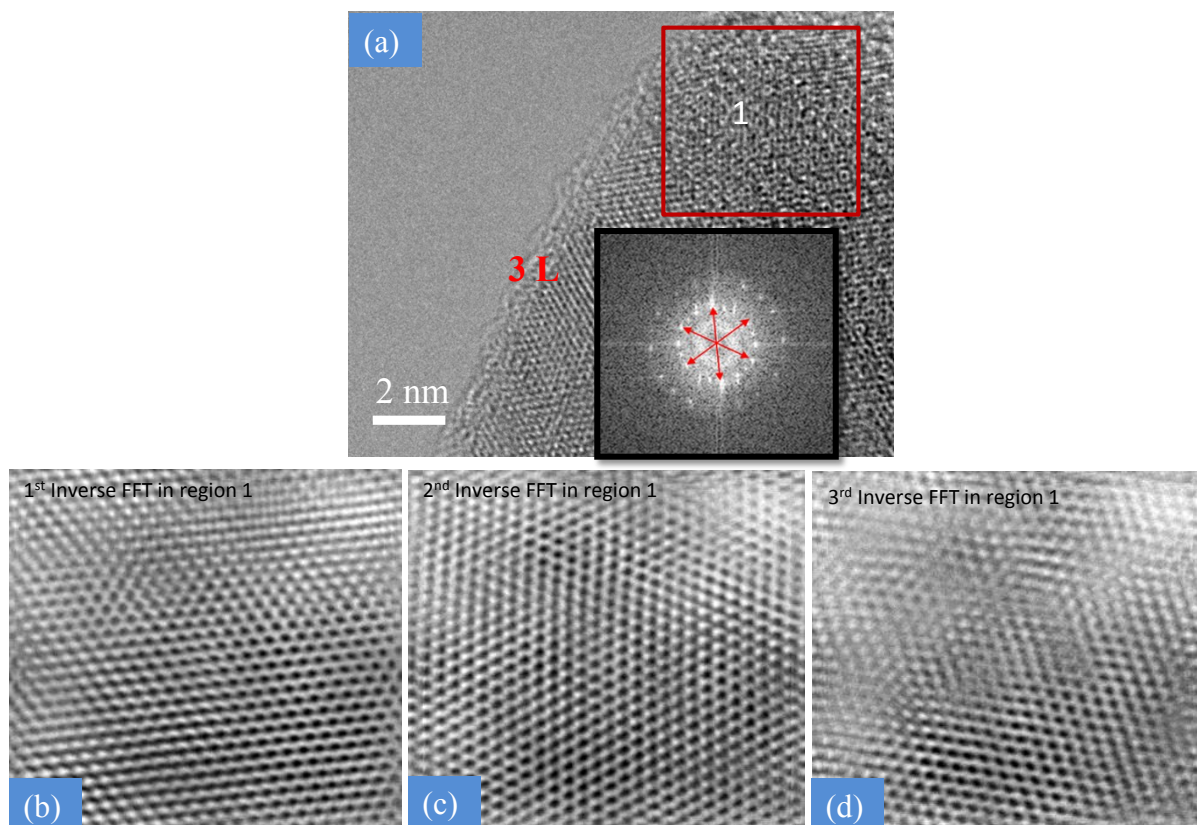

**Figure S4.** (a) HRTEM image of MoS<sub>2</sub> film synthesized from MoO<sub>3</sub> sputtered at 100 sec; (b-d) inverse FFT of diffraction patterns of region 1

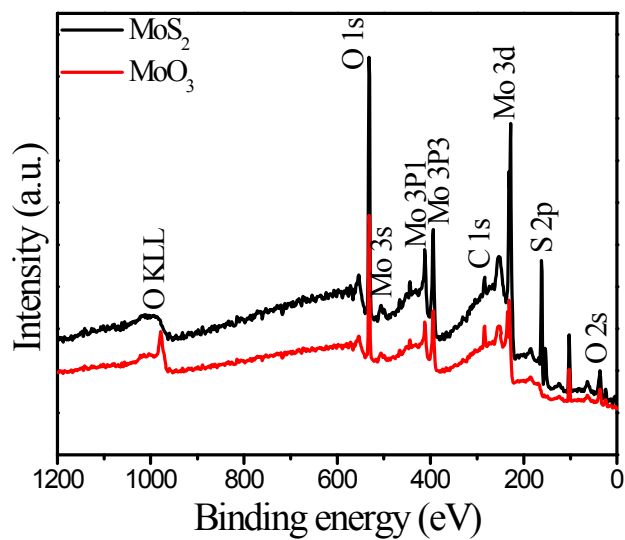

**Figure S5.** X-ray photoemission spectroscopy (XPS) spectra of as-sputtered MoO<sub>3</sub> film and MoS<sub>2</sub> monolayer film.

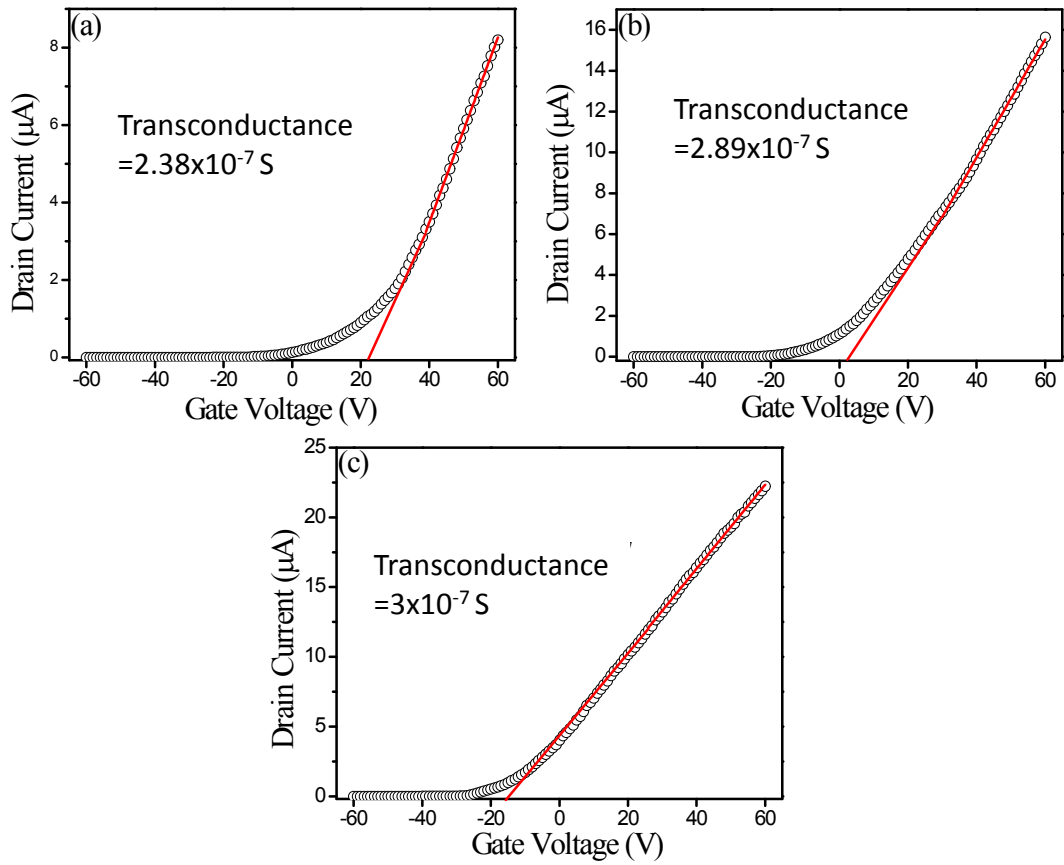

**Figure S6.** Transfer curves of MoS<sub>2</sub> FETs synthesized at different sputtering time of MoO<sub>3</sub> of (a) 80 sec (b) 100 sec (c) 150 sec ( $V_{ds} = 1V$ ). Red line is a transconductance. The extracted transconductance values of the bilayer (80 sec), trilayer (100 sec) and few-layer (150 sec) FETs are  $2.38 \times 10^{-7}$  S,  $2.89 \times 10^{-7}$  S and  $3.00 \times 10^{-7}$  S, respectively.

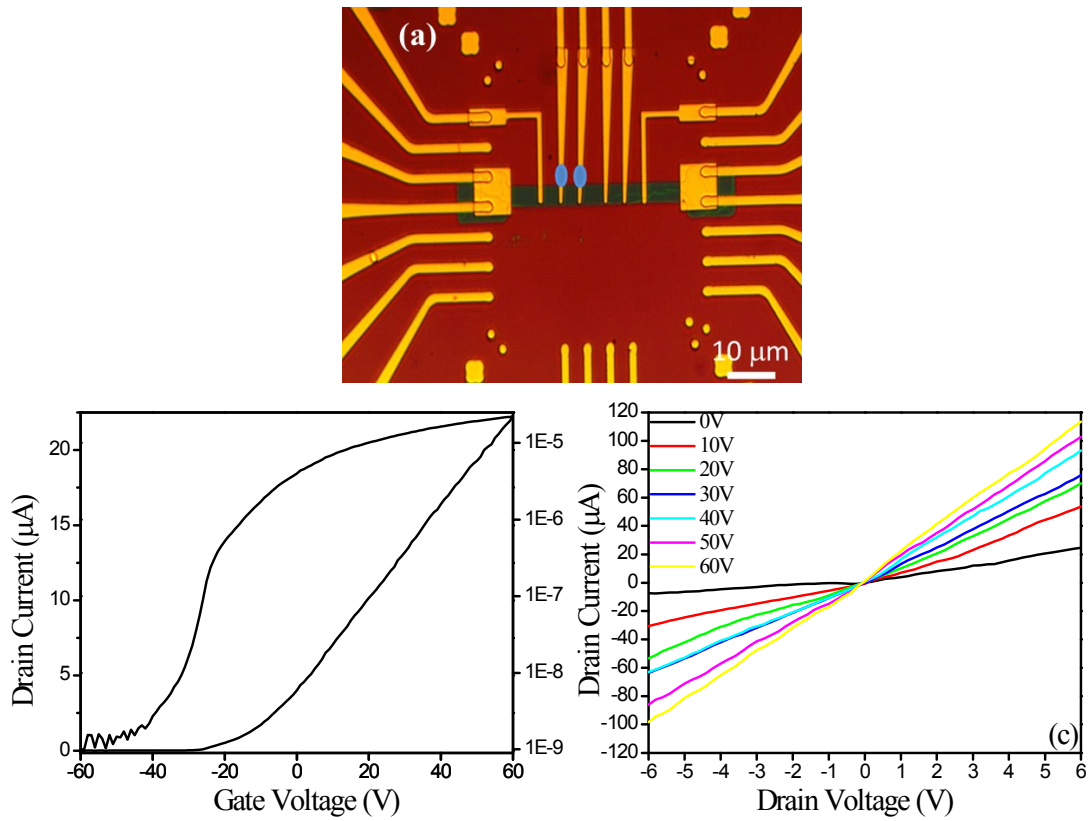

**Figure S7.** Electrical properties of few-layer MoS<sub>2</sub> FET. **(a)** Optical images of the fabricated MoS<sub>2</sub> FET. The blue-marked electrodes were used for electrical transport measurements. **(b)** Drain-source current ( $I_{ds}$ ) as a function of back-gate voltage ( $V_{gs}$ ) at fixed drain-source bias ( $V_{ds}$ ) = 1V. **(c)** Drain-source current ( $I_{ds}$ ) versus drain-voltage ( $V_{ds}$ ) at different back gate voltage  $V_{gs}$ .

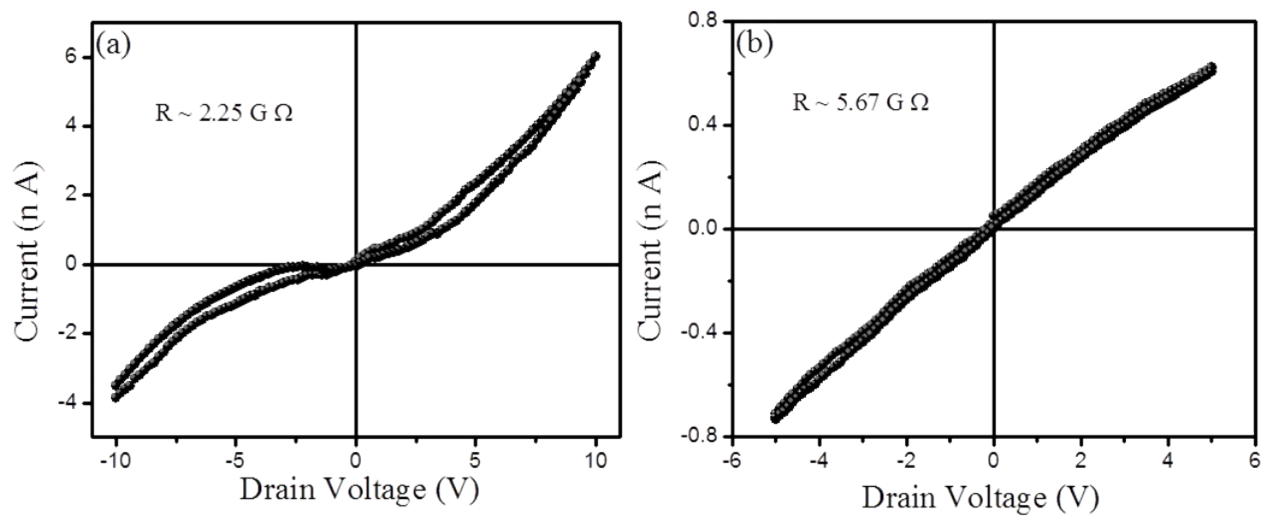

**Figure S8.** Electrical properties of monolayer MoS<sub>2</sub> FET with different electrode metals. **(a)** Au/Cr metal; **(b)** Ni metal.
